# Supplementary material for: Activating S surfaces by reversing the electron supply direction for fast hydrogen sensing
Source: Royal Society of Chemistry journal article supplement (doi:10.1039/d4qi01552e), 2024-01-01
Supplement: d4qi01552e1.pdf [file d4qi01552e1.pdf]

1

2

## Supporting Information

3 **Activating the S surfaces via Reversing the electron supply**  
4 **direction for fast Hydrogen Sensing**

5 *Xin Jia<sup>†a</sup>, Musen Li<sup>†b</sup>, Yurou Li<sup>a</sup>, Panzhe Qiao<sup>c</sup>, Xiaowu Wang<sup>a</sup>, Yi Jiang<sup>a</sup>, Mengmeng*

6 *Guo<sup>a</sup>, Pengfei Hu<sup>d</sup>, Bo Lu<sup>d</sup>, Bao-Li An<sup>a</sup>, Zhenggang Xue<sup>a,\*</sup>, Jiaqiang Xu<sup>a,\*</sup>*

7

8 **Table of Contents**

9 **1. Experiment detail**

10 **2. Supplementary Figures and Tables**

11 **3. References**

12

## 13 **1.Experiment detail**

### 14 **1.1 XAFS Measurements:**

15 The X-ray absorption fine structure data were collected at 1W1B station in Beijing  
16 Synchrotron Radiation Facility (BSRF). The storage rings of BSRF was operated at 2.5  
17 GeV with a maximum current of 250 mA. The X-ray absorption near edge structure  
18 (XANES) data were recorded in fluorescence mode. All samples were pelletized as  
19 disks of 13 mm diameter using poly(1,1-difluoroethylene) powder as a binder. The  
20 acquired extended X-ray absorption fine structure (EXAFS) data were processed  
21 according to the standard procedures using the ATHENA module implemented in the  
22 IFEFFIT software packages. <sup>1</sup>The EXAFS spectra were obtained by subtracting the  
23 post-edge background from the overall absorption and then normalizing with respect to  
24 the edge-jump step. Subsequently,  $\chi(k)$  data in the k-space were Fourier transformed to  
25 real (R) space using a Hanning window ( $dk = 1.0 \text{ \AA}^{-1}$ ) to separate the EXAFS  
26 contributions from different coordination shells.

### 27 **1.2 Ex situ XPS experiments:**

28 *Ex situ* XPS measurements were carried out on X-ray photoelectron spectroscopy (XPS,  
29 ESCALAB 250Xi, Thermofisher Scientific) and binding energies were calibrated the  
30 of the elements by C 1s (284.6 eV). During the test, the sample was first mounted on a  
31 transfer bar and then transferred to the reaction chamber. Next, a gold-plated copper  
32 seal was installed to seal the reaction chamber. Then, the target temperature (170°C) is  
33 set and the corresponding air is injected for pretreatment for 5 minutes. Finally, the  
34 reaction chamber is evacuated, and then transferred directly to the analysis chamber for

35 testing and analysis. The data obtained is the XPS spectra in air. The reaction chamber  
36 was transferred out of the analysis chamber. The corresponding mixture of H<sub>2</sub> gas and  
37 air is injected for pretreatment for 5 minutes (H<sub>2</sub> in the gas mixture at a concentration  
38 of 2%). Then, the reaction chamber was vacuumed, and then directly transferred to the  
39 reaction chamber for testing and analysis. The obtained data is XPS spectra in H<sub>2</sub>.

#### 40 **1.3 *In situ Raman experiments:***

41 The Raman spectra were obtained on a Renishaw spectrometer (Raman, INVIA). The  
42 sample was first placed on a silicon wafer in the in-situ reactor. Then a mixture of H<sub>2</sub>  
43 gas and air was injected and the Raman spectrum is collected (2% of H<sub>2</sub> in the gas  
44 mixture). Finally, data is collected every 30 s and the last data is collected at 150 s to  
45 end the test.

#### 46 **1.4 *Gas-sensing measurement:***

47 The gas-sensitive material was coated on the interdigital electrode of Micro Electro  
48 Mechanical System (MEMS) chip. Assembled MEMS sensors were placed onto the  
49 bottom of the chamber of LP-002A gas sensing system (Lingpan Electronics  
50 Technology Co. Ltd., China). The gas sensing system were shown in Figure S14-S15.

51 The operating voltage of the test circuit is 10 V. The resistance of sensors was obtained  
52 by detecting the voltage of the loading resistor in series. The resistance (R) of sensor  
53 were calculated by the Eq. (1):

$$54 \quad R = \left( \frac{10 - V_{out}}{V_{out}} \right) \cdot R_L \quad (1)$$

55 Where 10 is the circuit voltage, V<sub>out</sub> is the output voltage of the load resistance (R<sub>L</sub>)  
56 detected. The operating temperature of sensors was achieved by adjusting the heater

57 voltage. When the resistances kept stable, the test gas was injected into the 200 mL  
58 chamber. The amount of injected gas can be obtained through the Eq. (2):

$$59 \quad C_x = \frac{V_x}{200} \cdot C \quad (2)$$

60

61 Where  $V_x$ (mL) is the gas volume extracted from the gas sampling bags by the micro  
62 syringe, 200 is the volume of the test chamber, C is the standard concentration of gas  
63 in gas sampling bags and the  $C_x$  is the different gas concentration in the test chamber.

64 The response value of sensors in a reducing atmosphere is defined as  $\text{response} = R_a/R_g$ .

65 The resistance of the sensor in the air is recorded as  $R_a$  and that in the test gas is  $R_g$ .

66 The selectivity coefficient (K) can be used to quantitatively assess the selectivity of the  
67 sensor. The K value can be calculated by the Eq. (3):

$$68 \quad K = \frac{\text{response}_{SO_2}}{\text{response}_x} \quad (3)$$

69 where the response  $SO_2$  is the response of the sensor in 5 ppm  $SO_2$  and the response x  
70 is the response of the sensor in 5 ppm other gases.

### 71 **1.5 Gas ( $H_2$ ) Adsorption and Desorption Tests:**

72 The Quartz crystal microbalance (QCM) resonators were purchased from Chengdu

73 West Sensor Technology Co., Ltd. QCM measurement is composed of a thin slice of

74 quartz crystal with double-faced deposited silver electrodes. The mechanism of QCM

75 is based on the piezoelectric effect of quartz crystal oscillator, where there is a  
76 quantitative relationship between the increasing mass change ( $\Delta m$ ) and decreasing  
77 frequency change ( $\Delta f$ ). The quantitative relationship is in accordance with the  
78 Sauerbrey equation:  $\Delta f = -2.3 \times 10^{-6} \times f_0^2 \Delta m / A$ . Where  $f_0$  is the inherent oscillation  
79 frequency of the chip ( $10^7$ , Hz),  $A$  is the effective working area of the electrodes ( $d=3$   
80 mm).

### 81 **1.6 Methodology and calculation model:**

82 All DFT computations were performed in the Vienna ab initio simulation package  
83 (VASP) <sup>2</sup> under projector augmented wave (PAW) potentials to describe the  
84 interactions. The generalized gradient approximation (GGA) <sup>3</sup> in the Perdew–Burke–  
85 Ernzerhof (PBE) functional was used to treat the exchange-correlation between  
86 electrons. The way of DFT-D3 <sup>4</sup> was adopted to correct van der Waals force. A cut-off  
87 energy of 500 eV for plane wave expansions was used and all geometric structures were  
88 set a 10 Å vacuum layer in the z-direction. The  $10^{-5}$  eV for conventional energy and  
89  $0.02 \text{ eV \AA}^{-1}$  for force under a  $2 \times 2 \times 1$  sheet k-point mesh were taken as the convergence  
90 criteria to optimize the structures. The electronic structures of the density of state (DOS)  
91 were calculated with  $3 \times 3 \times 1$  k-points. In all of the structure optimization, the bottom  
92 half of the slab in the vertical z-direction was constrained, while the top half of the slab  
93 and the adsorbates were fully relaxed. In this calculation, the ZnS (0 0 2) was modeled  
94 by a  $2 \times 2$  supercell. The adsorption energy ( $\Delta E$ ) of  $H_2$  on the substrates can be given by  
95 Eq. (4):

$$96 \Delta E = E_{\text{total}} - E_{H_2} - E_{\text{substrate}} \quad (4)$$

97 Where  $E_{\text{total}}$ ,  $E_{\text{H}_2}$ , and  $E_{\text{substrate}}$  are the energy of  $\text{H}_2$  adsorption on the substrate, energy

98 of  $\text{H}_2$ , and energy of substrate, respectively.

## 99 2. Supporting Figures and Tables

100

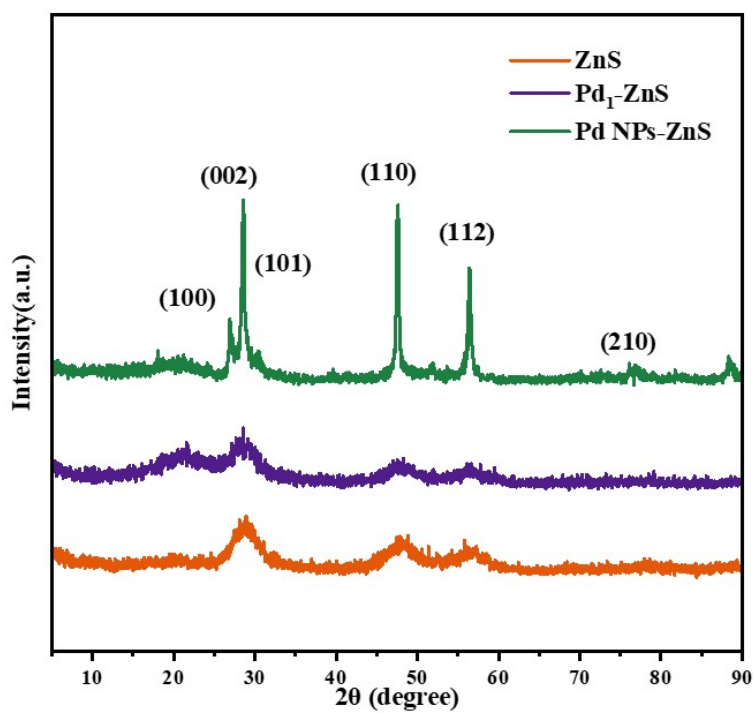

101

102

**Fig. S1.** XRD pattern of the ZnS, Pd<sub>1</sub>-ZnS and Pd NPs-ZnS.

103

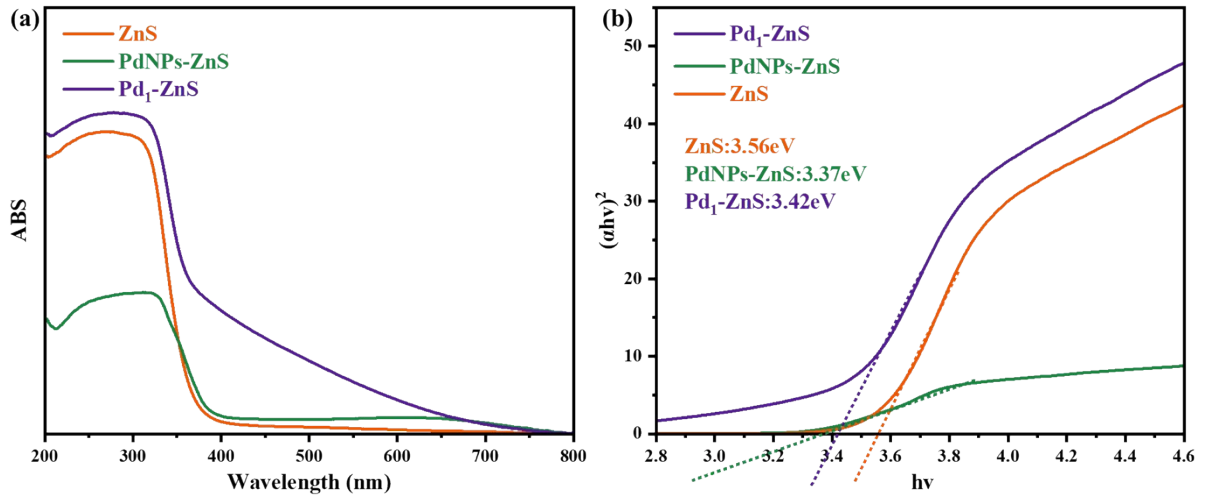

104

105 **Fig. S2.** (a) UV-vis diffuse reflectance spectrum and (b) Kubelka-Munk function  
 106 curve plotted against photon versus the energy of absorbed light of ZnS, Pd<sub>1</sub>-ZnS and  
 107 Pd NPs-ZnS.

108 The relationship between  $(\alpha hv)^2$  and photon energy  $h\nu$  is obtained according to the  
 109 formula  $(\alpha hv)^2 = A (h\nu - E_g)$ , where  $\alpha$ , A, h and  $\nu$  are the absorption coefficient,  
 110 absorption constant, Plank constant and light frequency, respectively. Extrapolate the  
 111 part of the spectra near the absorption edge, the intersection with the abscissas is  
 112 obtained.



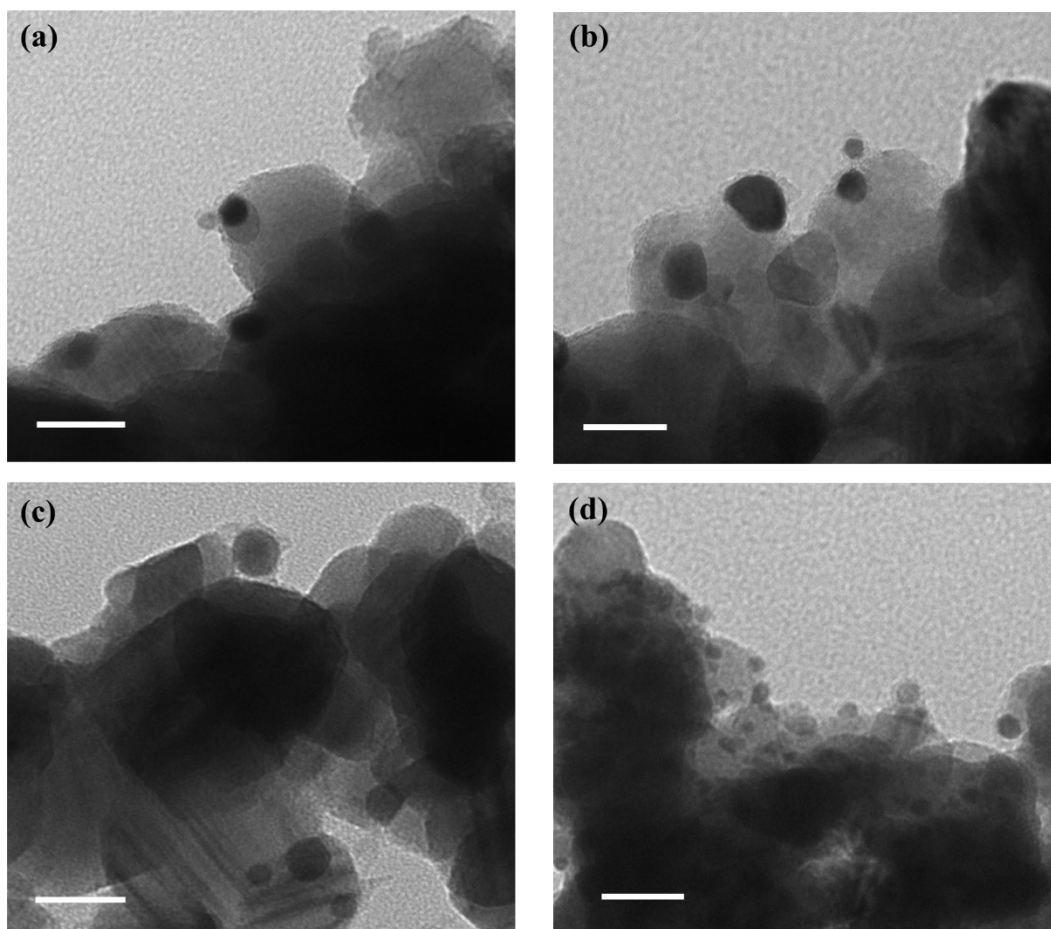

114

115 **Fig. S3.** TEM images of Pd NPs-ZnS, scale bar is 25 nm.

116

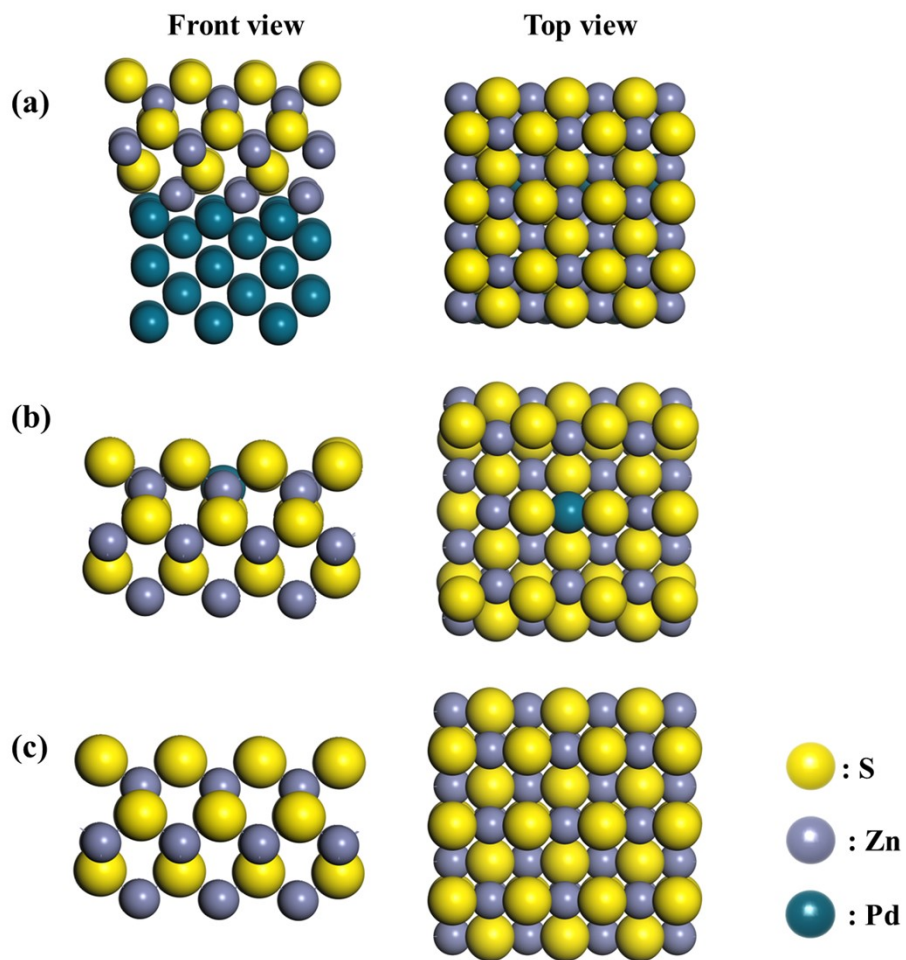

117

118 **Fig. S4.** Structure models for (a) Pd NPs-ZnS (b) Pd<sub>1</sub>-ZnS (c) ZnS.

119

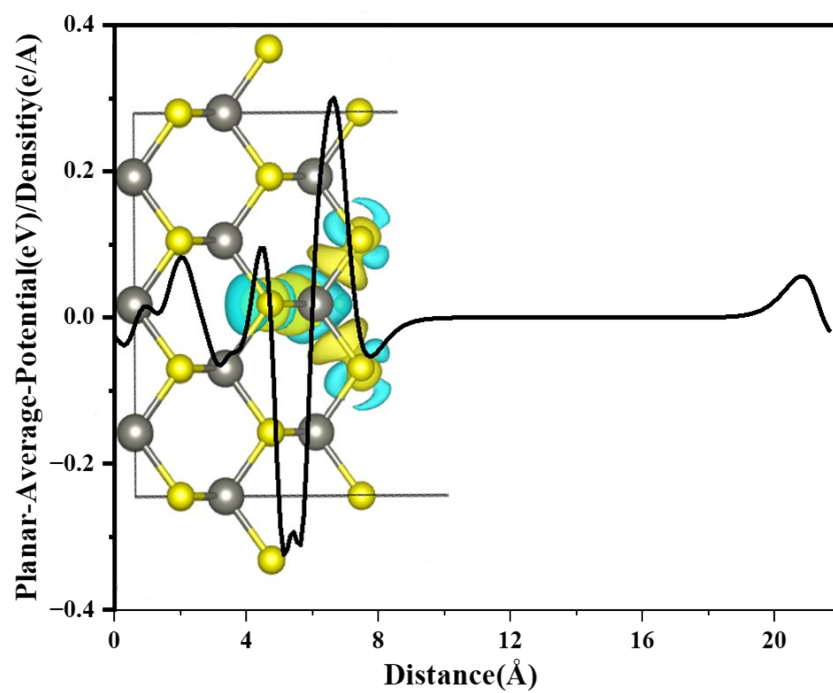

120

121 **Fig. S5.** The planar-averaged electron density difference  $\Delta\rho(z)$  of Pd<sub>1</sub>-ZnS.

122

123

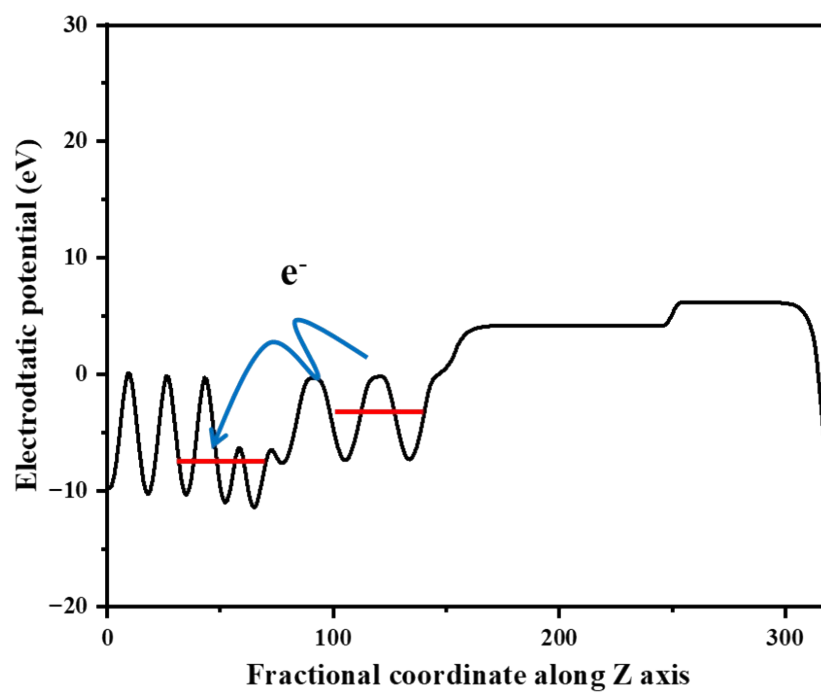

124

125 **Fig. S6.** Work functions of Pd NPs-ZnS.

126

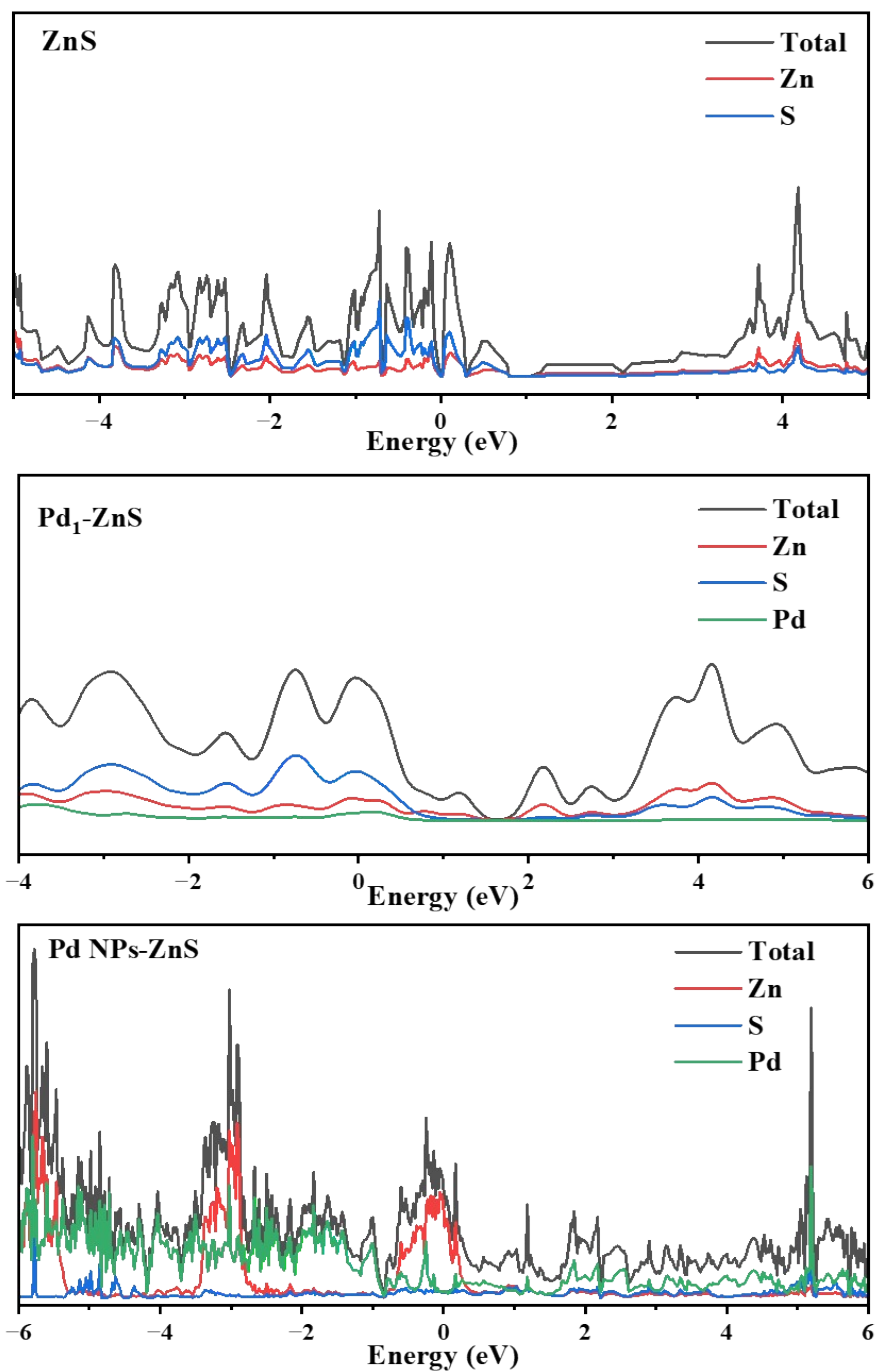

127

128 **Fig. S7.** The total density of states (TDOS) and projected density of state (PDOS) of  
 129 ZnS, Pd<sub>1</sub>-ZnS and Pd NPs-ZnS.

130 When electrons flow into a material, the Fermi-level of the material will increase, and  
 131 when electrons flow out, the Fermi-level of the material will decrease.

132

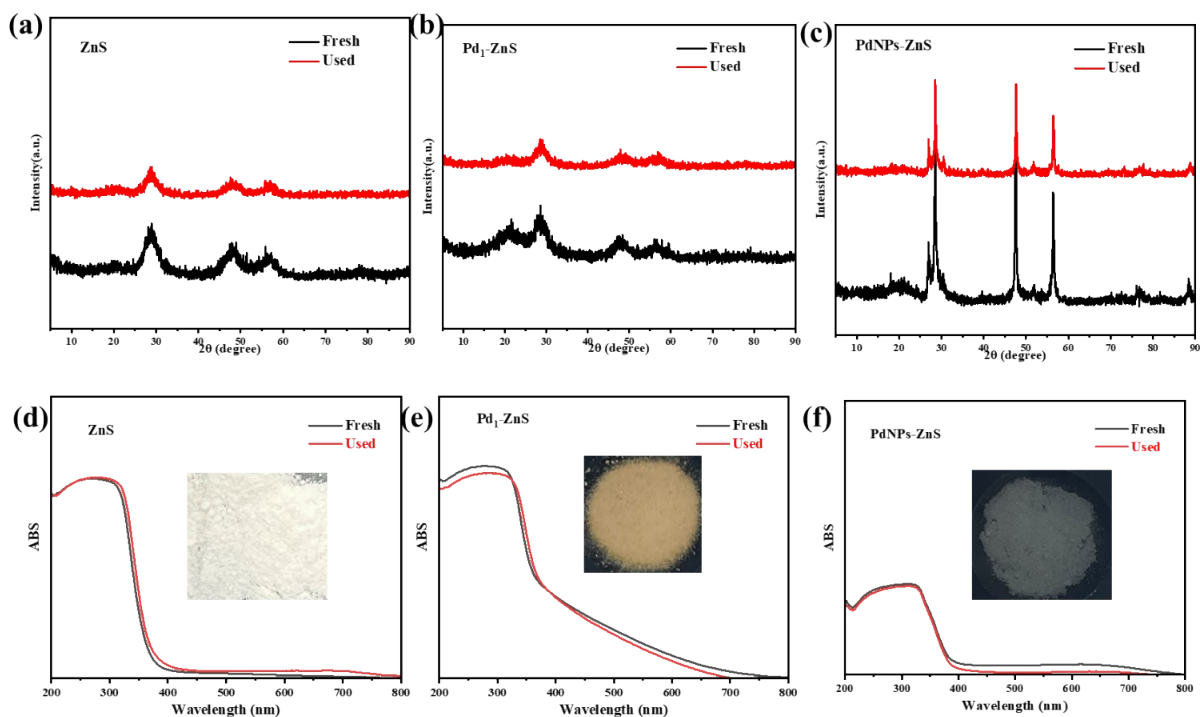

133

134 **Fig. S8.** (a-c) XRD pattern of the ZnS and ZnS after 200°C for 2h, Pd<sub>1</sub>-ZnS and Pd<sub>1</sub>-  
 135 ZnS after 170°C for 2h, Pd NPs-ZnS and Pd NPs-ZnS after 200°C for 2h. (d-f) UV-vis  
 136 diffuse reflectance spectra of the ZnS and ZnS after 200°C for 2h, Pd<sub>1</sub>-ZnS and Pd<sub>1</sub>-  
 137 ZnS after 170°C for 2h, Pd NPs-ZnS and Pd NPs-ZnS after 200°C for 2h.

138 XRD and UV-vis spectra show that the three materials can maintain the corresponding  
 139 crystal structure at the corresponding optimum operating temperature.

140

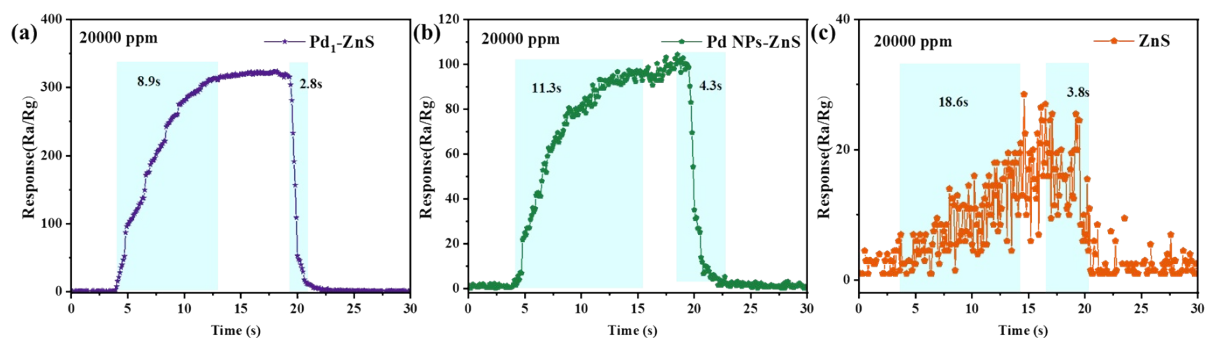

141

142 **Fig. S9.** Response transient of the Pd<sub>1</sub>-ZnS, Pd NPs-ZnS and ZnS sensors to 20000

143 ppm H<sub>2</sub>.

144 The response and recovery times of the Pd NPs-ZnS (11.3 s/4.3 s for 20000 ppm) and

145 ZnS (18.6s/3.8s for 20000 ppm) sensors are all longer than the response and recovery

146 times of Pd<sub>1</sub>-ZnS sensors (8.9s/2.9s for 20000 ppm).

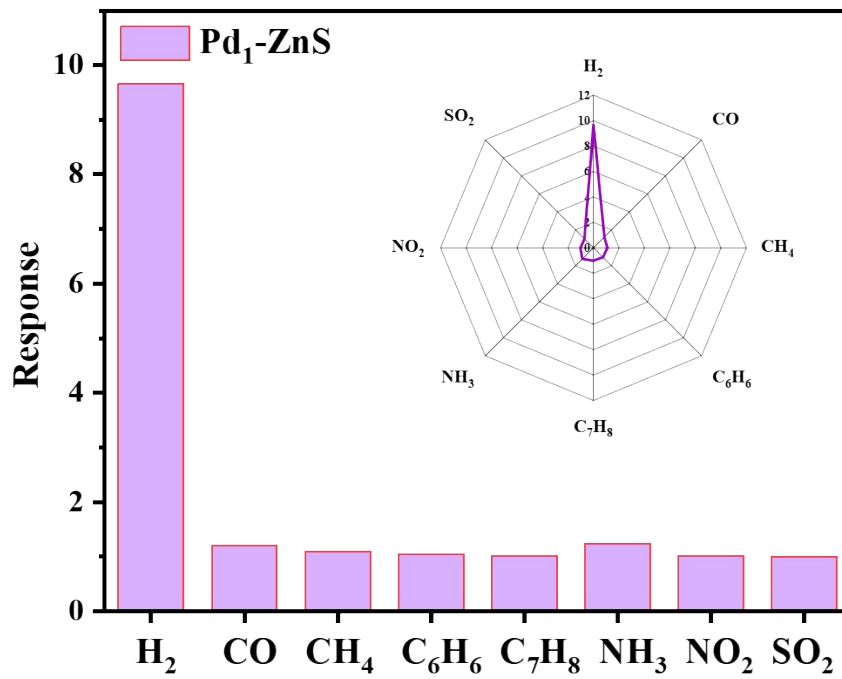

148

149 **Fig. S10.** Selectivity of Pd<sub>1</sub>-ZnS sensors towards 20 ppm various gas species.

150

151

152



153

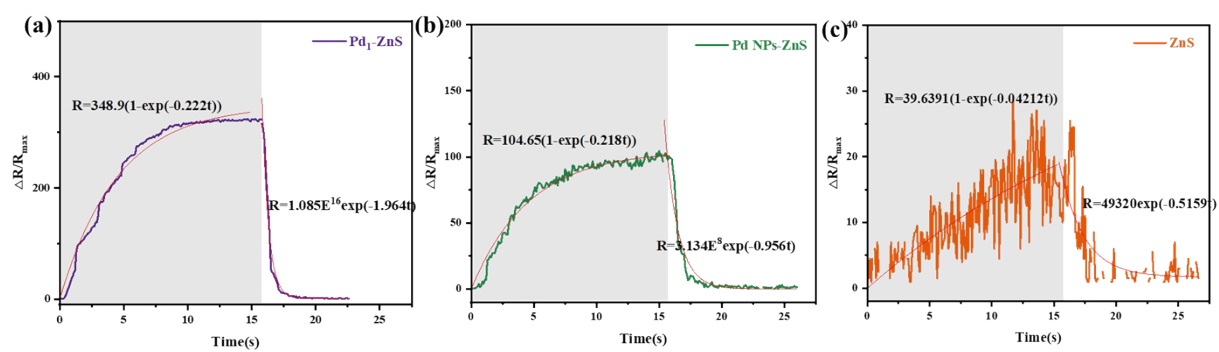

154

155 **Fig. S11.** Dynamic response transitions and the corresponding response/recovery  
156 fitting curves of the sensors for 20000 ppm of H<sub>2</sub> sensing.

157

158

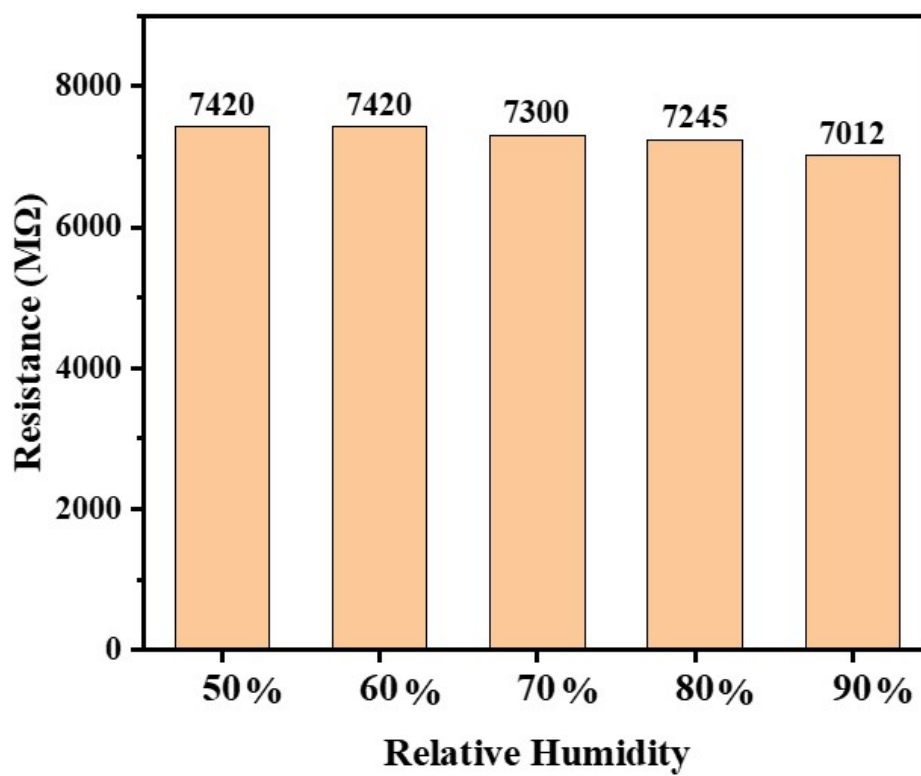

159

160 **Fig. S12.** Baseline resistance at different relative humidity of Pd1-ZnS in air.

161

162

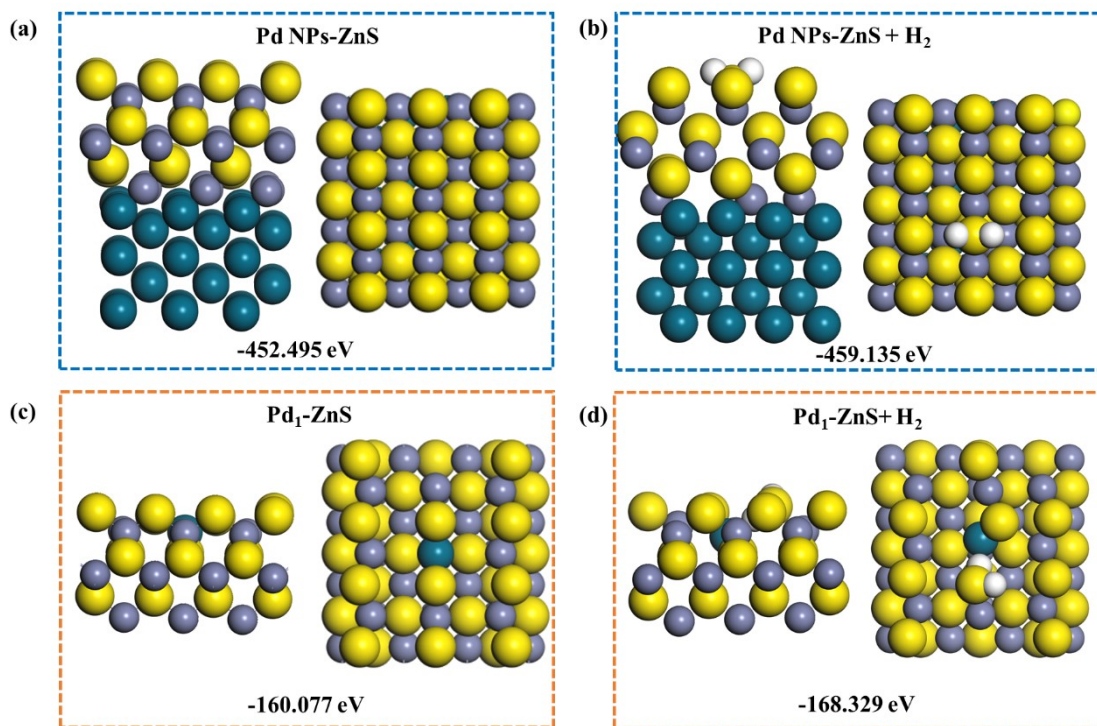

163

164 **Fig. S13.** Optimized models of the adsorption of the H<sub>2</sub> molecules and energies on Pd<sub>1</sub>-  
 165 ZnS and Pd NPs-ZnS.

166

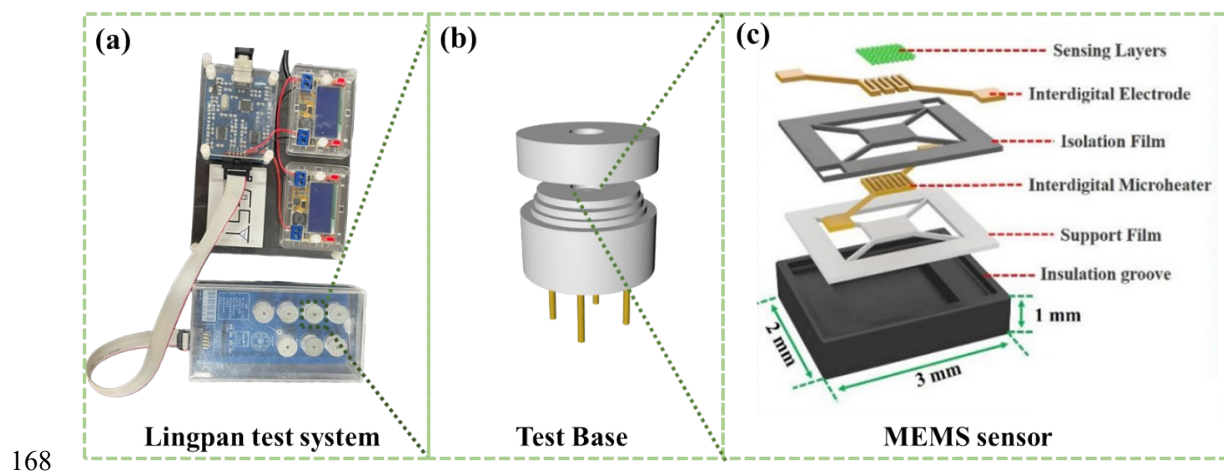

169 **Fig. S14.** Schematic of the fabrication for gas sensing system. (a) the gas sensing system  
170 LP-002A, (b) the exploded views of test base, (c) MEMS sensors.

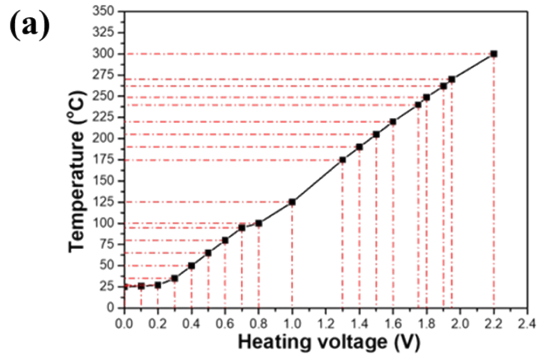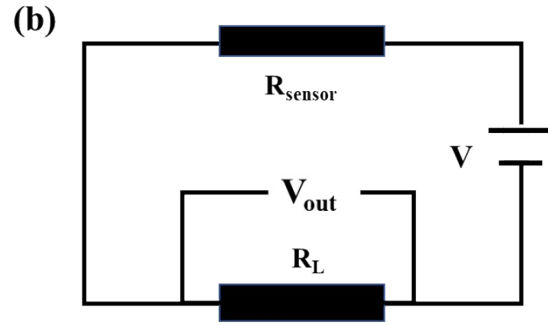

172

173 **Fig. S15.** (a) The relationship between the temperature and the voltage of MEMS gas  
 174 sensors, (b) measuring circuit of MEMS sensors.

175

176 **TableS1.** EXAFS fitting parameters at the Pd *K*-edge for various samples\*.

| Sample               | Shell  | $CN^a$ | $R(\text{\AA})^b$ | $\sigma^2(\text{\AA}^2)^c$ | $\Delta E_0(\text{eV})^d$ | <i>R</i> factor |
|----------------------|--------|--------|-------------------|----------------------------|---------------------------|-----------------|
| Pd foil              | Pd-Pd  | 12     | 2.74              |                            |                           | 0.002           |
| PdO                  | Pd-O   | 4.0    | 2.02              |                            |                           | 0.009           |
|                      | Pd-Pd1 | 4.0    | 3.02              |                            |                           |                 |
|                      | Pd-Pd2 | 8.0    | 3.41              |                            |                           |                 |
| Pd <sub>1</sub> -ZnS | Pd-S   | 4.3    | 2.34              | 0.0027                     | -6.3                      | 0.004           |

177 <sup>a</sup>*CN*, coordination number; <sup>b</sup>*R*, the distance to the neighboring atom; <sup>c</sup> $\sigma^2$ , the Mean Square Relative

178 Displacement (MSRD); <sup>d</sup> $\Delta E_0$ , inner potential correction; *R* factor indicates the goodness of the fit.

179 \*This value was fixed during EXAFS fitting, based on the known structure of Pd. Fitting range: 2.6

180  $\leq k (\text{\AA}^{-1}) \leq 12.7$  and  $1.4 \leq R (\text{\AA}) \leq 3.0$  (Pd foil),  $2.5 \leq k (\text{\AA}^{-1}) \leq 12.4$  and  $1.0 \leq R (\text{\AA}) \leq 3.6$  (PdO), 2.6

181  $\leq k (\text{\AA}^{-1}) \leq 10.6$  and  $1.2 \leq R (\text{\AA}) \leq 2.2$  (Pd<sub>1</sub>-ZnS).

182

183 **Table S2.** The content of noble metals in the obtained composites was measured by ICP-OES.  
184

| <b>Samples</b>       | <b>Zn (<math>\mu\text{g/ml}</math>)</b> | <b>Pd (<math>\mu\text{g/ml}</math>)</b> | <b>Content of Pd (wt%)</b> |
|----------------------|-----------------------------------------|-----------------------------------------|----------------------------|
| Pd <sub>1</sub> -ZnS | 8.308                                   | 0.0379                                  | 0.45                       |
| Pd NPs-ZnS           | 7.024                                   | 0.0368                                  | 0.52                       |

185

186 **Table S3.** The summary of the response time( $\tau_{res}$ ) of the sensors for the H<sub>2</sub> (1 ppm) sensing reaction.

| Operating<br>Temperature/ $^{\circ}\text{C}\cdot\text{K}^{-1}$ | Response time/s |         |            |
|----------------------------------------------------------------|-----------------|---------|------------|
|                                                                | ZnS             | Pd1-ZnS | Pd NPs-ZnS |
| 140/413                                                        | 12.25           | 7.52    | 11.25      |
| 150/423                                                        | 11.78           | 6.35    | 10.25      |
| 160/433                                                        | 10.48           | 6.27    | 9.55       |
| 170/443                                                        | 10.48           | 5.42    | 8.95       |
| 180/453                                                        | 9.45            | 5.02    | 8.34       |
| 200/473                                                        | 6.43            | /       | 6.52       |
| 220/493                                                        | 5.13            | /       | 5.22       |

187 When the obtained sensor response kinetics is governed by the adsorption process,  
 188 the relaxation time ( $\tau_{res}$ ) can be written as a function of temperature according to the  
 189 well-known thermal activation function.

190 
$$\tau_{res} = \tau_0 \exp\left(\frac{E_{act}}{RT}\right)$$

191 
$$\ln \tau_{res} = \ln \tau_0 + E_{act}/RT$$

192 
$$\text{Slope} = E_{act}/R$$

193 Here, where  $\tau_0$  is the pre-exponential constant, which is determined only by the  
 194 nature of the reaction and independent of the reaction temperature and gas  
 195 concentration in the system; T is the working temperature (K) and R is the universal  
 196 gas constant ( $8.314 \text{ J}\cdot\text{mol}^{-1}\cdot\text{K}^{-1}$ );  $E_{act}$  is the activation energies.

197



198 **Table S4.** The of QCM tests.

199

200

| <b>Sample</b>             | <b>Fundamental frequency (10<sup>6</sup> hz)</b> | <b>Frequency after coating (10<sup>6</sup> hz)</b> | <b>Frequency shift (hz)</b> | <b>Load mass (ng)</b> |
|---------------------------|--------------------------------------------------|----------------------------------------------------|-----------------------------|-----------------------|
| <b>ZnS</b>                | 10003080.9                                       | 9998001.4                                          | 5079.5                      | 2821.9                |
| <b>Pd NPs-ZnS</b>         | 10002847.2                                       | 10002518.7                                         | 328.5                       | 182.5                 |
| <b>Pd<sub>1</sub>-ZnS</b> | 10002986.1                                       | 10002704.2                                         | 281.9                       | 156.61                |

201 **Table S5.** The summary of the reaction rate constants of ZnS, Pd<sub>1</sub>-ZnS and Pd NPs-ZnS.

| <b>Sample</b>             | <b>K<sub>ads</sub> (ppm<sup>-1</sup>S<sup>-1</sup>)</b> | <b>K<sub>des</sub> (S<sup>-1</sup>)</b> | <b>K ( K<sub>ads</sub> / K<sub>des</sub> ppm<sup>-1</sup>)</b> |
|---------------------------|---------------------------------------------------------|-----------------------------------------|----------------------------------------------------------------|
| <b>ZnS</b>                | 1.298*10 <sup>-6</sup>                                  | 0.516                                   | 2.516*10 <sup>-6</sup>                                         |
| <b>Pd NPs-ZnS</b>         | 9.164*10 <sup>-7</sup>                                  | 0.956                                   | 9.586*10 <sup>-7</sup>                                         |
| <b>Pd<sub>1</sub>-ZnS</b> | 2.465*10 <sup>-6</sup>                                  | 1.964                                   | 1.255*10 <sup>-6</sup>                                         |

202

203

204 **Table S6.** The reported H<sub>2</sub> sensors and their gas sensing performances.

205

| Sensing material                              | H <sub>2</sub> Conc. (ppm) | Operating temperature (°C) | Response (R <sub>a</sub> /R <sub>g</sub> ) | LOD (ppm) | Response/recovery times | Ref.             |
|-----------------------------------------------|----------------------------|----------------------------|--------------------------------------------|-----------|-------------------------|------------------|
| Pd-SnO <sub>2</sub> nanosheets                | 100                        | 200                        | 33                                         | 0.45      | 10 s/62 s               | 5                |
| ZnO/ZnS core-shell                            | 1000 ppm                   | 300                        | 20%                                        | 500       | /                       | 6                |
| ZnO NFs                                       | 10                         | 350                        | 150                                        | 0.1       | >2 min/>5 min           | 7                |
| Pd/SnO <sub>2</sub> nanowires                 | 100                        | 150                        | 4.5                                        | 1         | > 5 min/<br>> 6 min     | 8                |
| Pd/ZnO-SnO <sub>2</sub> NFs                   | 200                        | 270                        | 171                                        | 0.25      | 1 s/20 s                | 9                |
| 0.2%Pt-SnO <sub>2</sub> nanoparticles         | 1%                         | 200                        | 150.2                                      | 200       | 60s/120s                | 10               |
| Pd nanopattern                                | 1000                       | 25                         | 1.5%                                       | 2.5       | 12s/30s                 | 11               |
| Hollow Pd-Sn alloy nanotubes                  | 200                        | 25                         | 1.63%                                      | 1         | 20/18                   | 12               |
| Pd single-atom-Co <sub>3</sub> O <sub>4</sub> | 1000                       | 125                        | 80                                         | /         | 15s/70s                 | 13               |
| 1.5%Pd/ZnO                                    | 100                        | 360                        | 11.3                                       | 5         | 2s/5s                   | 14               |
| Pd/SiC                                        | 100                        | 380                        | 14.48                                      | 5         | 10/18                   | 15               |
| Pd-Au NDs/In <sub>2</sub> O <sub>3</sub> NCBs | 500                        | 280                        | 45                                         | 0.3       | 5/3                     | 16               |
| PdO/WO <sub>3</sub>                           | 10                         | 150                        | 76                                         | 5         | 5/113                   | 17               |
| <b>Pd<sub>1</sub>-ZnS</b>                     | <b>400</b>                 | <b>170</b>                 | <b>70.66</b>                               | <b>20</b> | <b>5.1/1.8</b>          | <b>This work</b> |

206

207

208 **Reference:**

- 209 1 X. Wang, W. Chen, L. Zhang, T. Yao, W. Liu, Y. Lin, H. Ju, J. Dong, L. Zheng, W. Yan, X.  
210 Zheng, Z. Li, X. Wang, J. Yang, D. He, Y. Wang, Z. Deng, Y. Wu and Y. Li, *J. Am. Chem. Soc.*,  
211 2017, **139**, 9419–9422.
- 212 2 G. Kresse and J. Furthmüller, *Phys. Rev. B*, 1996, **54**, 11169–11186.
- 213 3 J. P. Perdew, K. Burke and M. Ernzerhof, *Phys. Rev. Lett.*, 1996, **77**, 3865–3868.
- 214 4 S. Grimme, J. Antony, S. Ehrlich and H. Krieg, *J. Chem. Phys.*, 2010, **132**, 154104.
- 215 5 G. Li, Y. Fan, Q. Hu, D. Zhang, Z. Ma, Z. Cheng, X. Wang and J. Xu, *J. Alloys Compd.*, 2022,  
216 **906**, 163765.
- 217 6 Y.-S. Tsai, T.-W. Chou, C. Y. Xu, W. Chang Huang, C. F. Lin, Y. S. Wu, Y.-S. Lin and H. Chen,  
218 *Ceram. Int.*, 2019, **45**, 17751–17757.
- 219 7 J.-H. Kim, A. Mirzaei, H. Woo Kim, P. Wu and S. S. Kim, *Sens. Actuators B Chem.*, 2019, **293**,  
220 210–223.
- 221 8 Z. Cai and S. Park, *Sens. Actuators B Chem.*, 2020, **322**, 128651.
- 222 9 K. Hu, F. Wang, Z. Shen, H. Liu and J. Xiong, *J. Alloys Compd.*, 2021, **850**, 156663.
- 223 10 C. Liewhiran, N. Tamaekong, A. Wisitsoraat, A. Tuantranont and S. Phanichphant, *Sens.*  
224 *Actuators B Chem.*, 2013, **176**, 893–905.
- 225 11 S.-Y. Cho, H. Ahn, K. Park, J. Choi, H. Kang and H.-T. Jung, *ACS Sens.*, 2018, **3**, 1876–1883.
- 226 12 L. Song, J. Ahn, D.-H. Kim, H. Shin and I.-D. Kim, *ACS Appl. Mater. Interfaces*, 2022, **14**,  
227 28378–28388.
- 228 13 K. Koga, *ACS Appl. Mater. Interfaces*, 2020, **12**, 20806–20823.
- 229 14 J. Gao, B. Wu, C. Cao, Z. Zhan, W. Ma and X. Wang, *ACS Sustain. Chem. Eng.*, 2021, **9**, 6370–  
230 6379.
- 231 15 A. Kumar, A. Kumar and R. Chandra, *Sens. Actuators B Chem.*, 2018, **264**, 10–19.
- 232 16 X. Zhao, L. Du, X. Xing, Z. Li, Y. Tian, X. Chen, X. Lang, H. Liu and D. Yang, *Small*, **n/a**,  
233 2311840.
- 234 17 L. Cai, S. Zhu, G. Wu, F. Jiao, W. Li, X. Wang, Y. An, Y. Hu, J. Sun, X. Dong, J. Wang, Q.  
235 Lu, Q. Jing and B. Liu, *Int. J. Hydrog. Energy*, 2020, **45**, 31327–31340.
- 236
